# Supplementary material for: Atomistic insights of a chemical complexity effect on the irradiation resistance of high entropy alloys
Source: Royal Society of Chemistry journal article supplement (doi:10.1039/d1ma01184g), 2021-12-21
Supplement: d1ma01184g1.pdf [file d1ma01184g1.pdf]

# **The atomistic insights of chemical complexity effect on irradiation resistance of high entropy alloys**

**Lingyun Qian<sup>1</sup>, Honggang Bao<sup>1</sup>, Rui Li<sup>1,\*</sup>, Qing Peng<sup>2,3,\*</sup>**

<sup>1</sup> School of Mechanical Engineering, University of Science and Technology Beijing, Beijing, 100083, China;

<sup>2</sup> Physics Department, King Fahd University of Petroleum and Minerals, Dhahran 31261, Saudi Arabia

<sup>3</sup> K.A.CARE Energy Research & Innovation Center at Dhahran, Dhahran, 31261, Saudi Arabia

## **Supplementary Information**

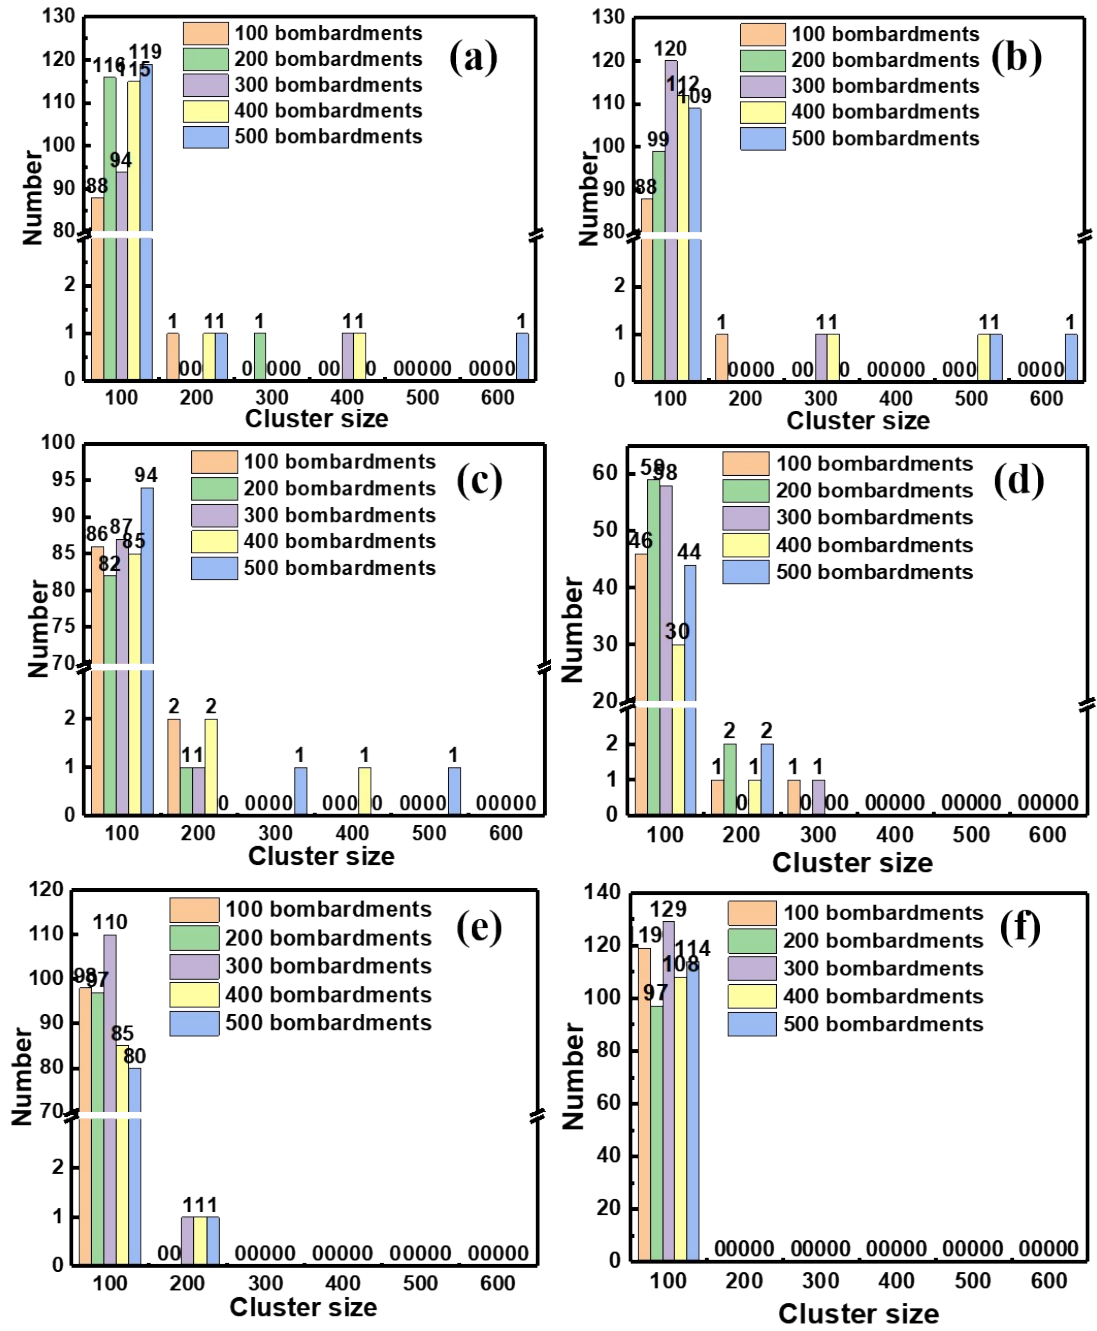

Figure S1. The sizes of defect cluster during the bombardment of six FCC materials. (a)-(f) are Ni, FeNi, CrFeNi, CoCrFeNi, CoCrCuFeNi and CoCrFeMnNi, respectively.

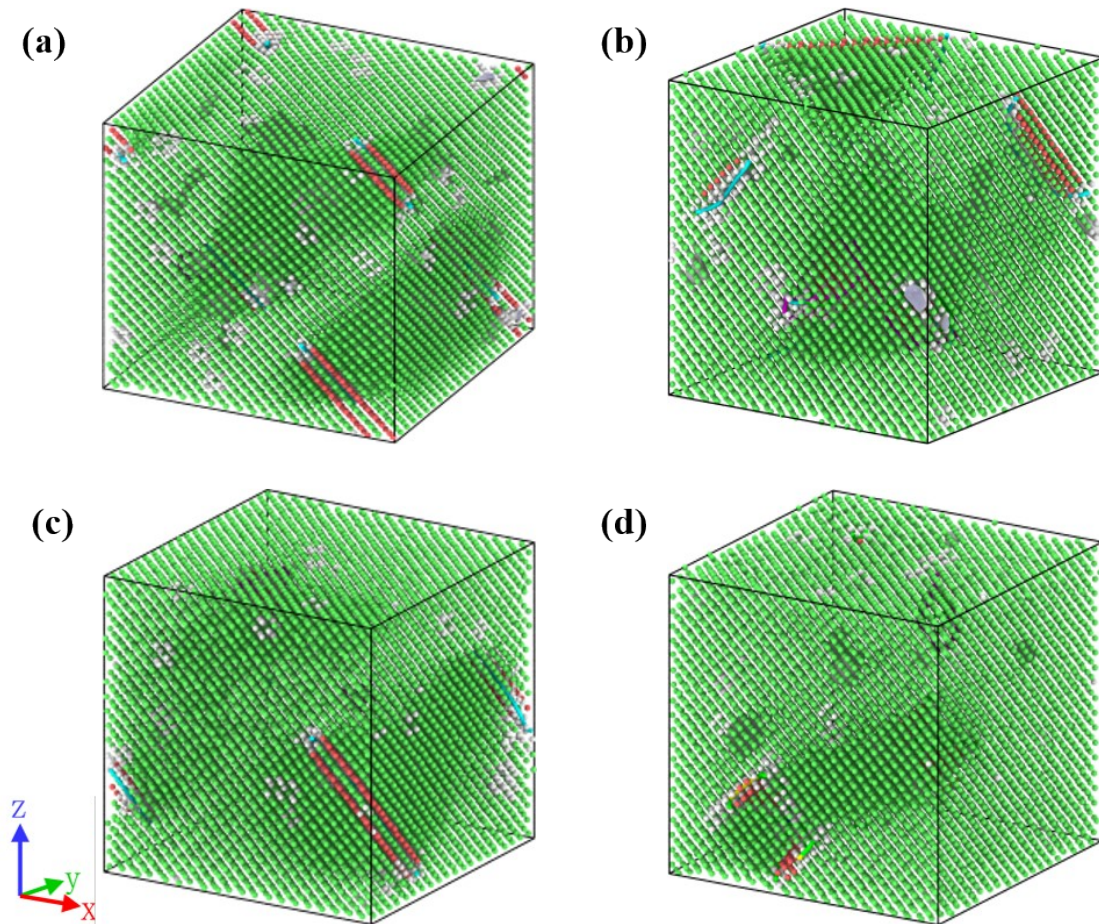

Figure S2. The distribution of stacking fault atoms after 500 times of bombardment. (a)-(d) are Ni, FeNi, CrFeNi and CoCrFeNi, respectively. The red, white dots are the stacking fault atoms and other atoms, respectively. Green, blue, yellow, purple, light blue lines represent  $1/6\langle 112 \rangle$ Shockley,  $1/2\langle 112 \rangle$ Perfect,  $1/3\langle 001 \rangle$ Hirth,  $1/6\langle 110 \rangle$ Stair-rod and  $1/3\langle 111 \rangle$ Frank dislocation, respectively.

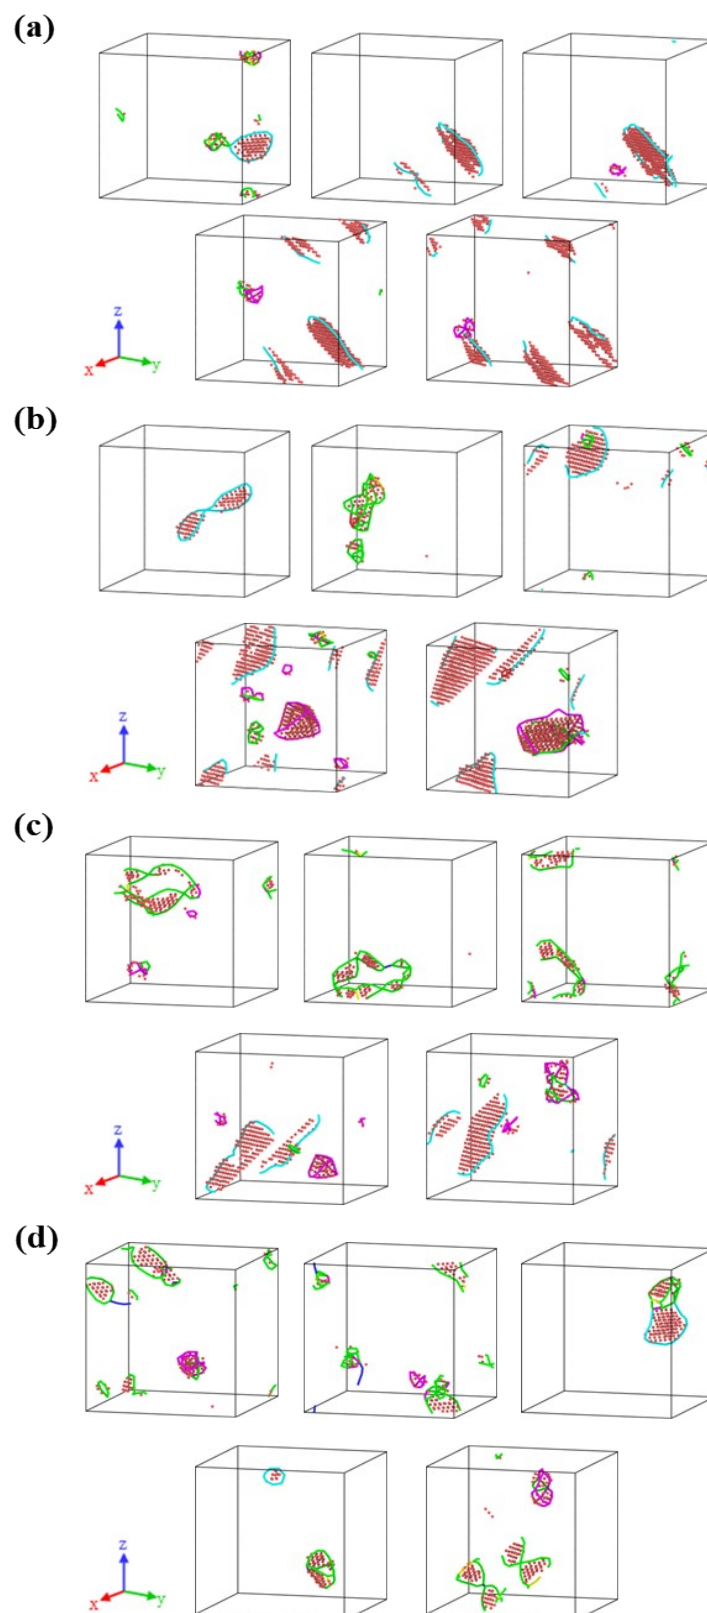

Figure S3. The dislocation and atomic distribution of stacking faults during the bombardments. (a)-(d) are Ni, FeNi, CrFeNi and CoCrFeNi, respectively. There is an interval of 100 times of bombardment between adjacent pictures. The dots and lines represent the same meaning with Figure S2.
